# Supplementary material for: Upscaling effects on infectious disease emergence risk emphasize the need for local planning in primary prevention within biodiversity hotspots
Source: Research Square preprint supplement (doi:10.21203/rs.3.rs-6340440/v1), 2025-04-08
Supplement: Supplementary file 1 [file 19e9e43478ca454c40399f82.docx]

## **Supplemental Material**

####

**Upscaling effects on infectious disease emergence risk emphasize the need for local planning in primary prevention within biodiversity hotspots**

[*Renata L. Muylaert*](https://orcid.org/0000-0002-6466-6210)*1*,* [*David A. Wilkinson*](https://orcid.org/0000-0002-9986-6212)*2, Evita Izza Dwiyanti3,* [*David T. S. Hayman*](https://orcid.org/0000-0003-0087-3015)*1*

*1 Molecular Epidemiology and Public Health Laboratory, Hopkirk Research Institute, Massey University, Palmerston North, New Zealand*

*2 UMR ASTRE, CIRAD, INRAE, Université de Montpellier, Plateforme Technologique CYROI, Sainte-Clotilde, La Réunion France*

*3 Alam Sehat Lestari, Indonesia*

* Corresponding author**:** [r.delaramuylaert@massey.ac.nz](mailto:r.delaramuylaert@massey.ac.nz)

####

#### **This file includes:**

Tables S1-3

Figures S1-10

**Table S1.** Variation in Average values for spatial variables considering different Z-values.

**z Components value**

z = 0.20 bio 5.26

z = 0.30 bio 10.77

z = 0.20 eRIDE 2.42

z = 0.30 eRIDE 4.3

z = 0.20 PAR 16.11

z = 0.30 PAR 26.25

#####

##### **Table S2. Mean and standard deviations of empirically estimated *z*-values (rate of decline*)* for the SAR relationship**. Values are calculated from island species–area relationship (ISAR) and RANSAC versions of each dataset. Reference value for estimated risk for novel infectious disease emergence (eRIDE) calculation was set as 0.2.

| **Model** | **z-value** | **Reference** |
| --- | --- | --- |
| Invertebrates (n=20) | 0.24 ± 0.21 | (Matthews *et al.*, 2016) |
| Plants (n=8) | 0.14 ± 0.09 | (Matthews *et al.*, 2016) |
| Vertebrates (n=69) | 0.23 ± 0.13 | (Matthews *et al.*, 2016) |
| Microbial communities (n=1) | 0.28 | (Bell *et al.*, 2005) |

**Table S3.** z-value estimates for vertebrates from different island groups [(Matthews et al. 2019)](https://paperpile.com/c/Vv4AtK/Dlit) ordered alphabetically and by group (Birds, Mammals, Herpetofauna).

| Taxon | Archipelago | z |
| --- | --- | --- |
| Birds | French Frigate Shoals atoll and Perl & Hermes Reef (S.W.  Hawaii) | 0.54 |
| Birds | Maine, USA | 0.53 |
| Birds | Åland Islands, S.W. Finland | 0.51 |
| Birds | Boston Harbor Islands, Massachusetts | 0.5 |
| Birds | Indian Ocean Islands | 0.48 |
| Birds | Georgian Bay Islands, Great Lakes, USA | 0.47 |
| Birds | Fathom Five Islands, Great Lakes USA | 0.4 |
| Birds | Michigan Lake, Great Lakes, North America | 0.39 |
| Birds | New Zealand islands | 0.31 |
| Birds | Dahlak Archipelago, Red Sea | 0.31 |
| Birds | Samoa offshore Islands, Pacific | 0.25 |
| Birds | Hawaiian Islands, Pacific | 0.24 |
| Birds | Lago Guri islands, Venezuela | 0.24 |
| Birds | Philippine Islands | 0.24 |
| Birds | Lesser Antilles, Caribbean Sea | 0.21 |
| Birds | West Indies, Caribbean Sea | 0.19 |
| Birds | New Zealand islands | 0.17 |
| Birds | St. Lawrence, Great Lakes, USA | 0.17 |
| Birds | Cape Verde, Atlantic | 0.15 |
| Birds | Vanuatu, Pacific | 0.13 |
| Birds | Vava'u Group, Tonga | 0.07 |
| Birds (forest birds) | Andaman islands, Indian Ocean | 0.18 |
| Birds (passeriformes) | Thousand Island Lake Region, China | 0.21 |
| Herpetofauna | Green Bay, Lake Michigan USA | 0.46 |
| Herpetofauna | Western Lake Erie, USA | 0.42 |
| Herpetofauna | Gulf of California, Central America | 0.34 |
| Herpetofauna | St. Lawrence, Great Lakes, USA | 0.33 |
| Herpetofauna | Georgian Bay Islands, Great Lakes, USA | 0.31 |
| herpetofauna | Grenadines Islands, Caribbean Sea | 0.27 |
| Herpetofauna | Mediterranean Islands | 0.23 |
| Herpetofauna | Lesser Antilles, Caribbean Sea | 0.16 |
| Herpetofauna (amphibians) | Zhoushan archipelago, China | 0.31 |
| Herpetofauna (reptiles) | Adriatic Sea islands | 0.36 |
| Herpetofauna (reptiles) | Aegean Sea, Greece | 0.28 |
| Mammals | Green Bay, Lake Michigan USA | 0.41 |
| Mammals | Gulf of Maine, North America | 0.4 |
| Mammals | Papua New Guinea Islands | 0.35 |
| Mammals | Georgian Bay Islands, Great Lakes, USA | 0.35 |
| Mammals | Great Bay, Japanese Sea | 0.31 |
| Mammals | Adriatic Sea islands | 0.29 |
| Mammals | Fathom Five Islands, Great Lakes USA | 0.26 |
| Mammals | Japanese archipelago | 0.23 |
| Mammals | Gulf of Maine, North America | 0.21 |
| Mammals | Alexander Archipelago, Alaska | 0.18 |
| Mammals | New England, MA, USA | 0.06 |
| Mammals (bats) | West Indies, Caribbean Sea | 0.19 |
| Mammals (bats) | Baja, California | 0.09 |
| Mammals (non-volant) | West Indies, Caribbean Sea | 0.21 |
| Mammals (primates) | SE Asian Islands | 0.21 |
| Mammals (shrews) | Sysmä Lake, Finland | 0.27 |

##### **Table S4. Management level types and their respective pixel code.** The description was adapted from Lesiv et al [47](https://paperpile.com/c/jkfey0/ALH1). This forest management layer presents 100 m resolution data for 2015.

| **Pixel code** | **Type Broad** | **Type Specific** | **Description** |
| --- | --- | --- | --- |
| 11 | No management | No management | Not disturbed at 100 m buffer but can contain low human impact as houses and small crops within a 500 m buffer. |
| 20 | Managed | Managed low-level | Naturally regenerating forests with signs of forest selective logging, clear cuts etc. |
| 31 | Managed | Managed long time | Planted forests with more 15 year rotation time. |
| 32 | Managed | Managed short time | Planted forests with 15 year rotation time or less. |
| 40 | Managed | Managed oil Palm | Oil palm plantations. |
| 53 | Managed | Managed agroforestry | Orchards, olives, apples, nuts, cocoa, mixed crops, shifting cultivation, trees in built up areas. |


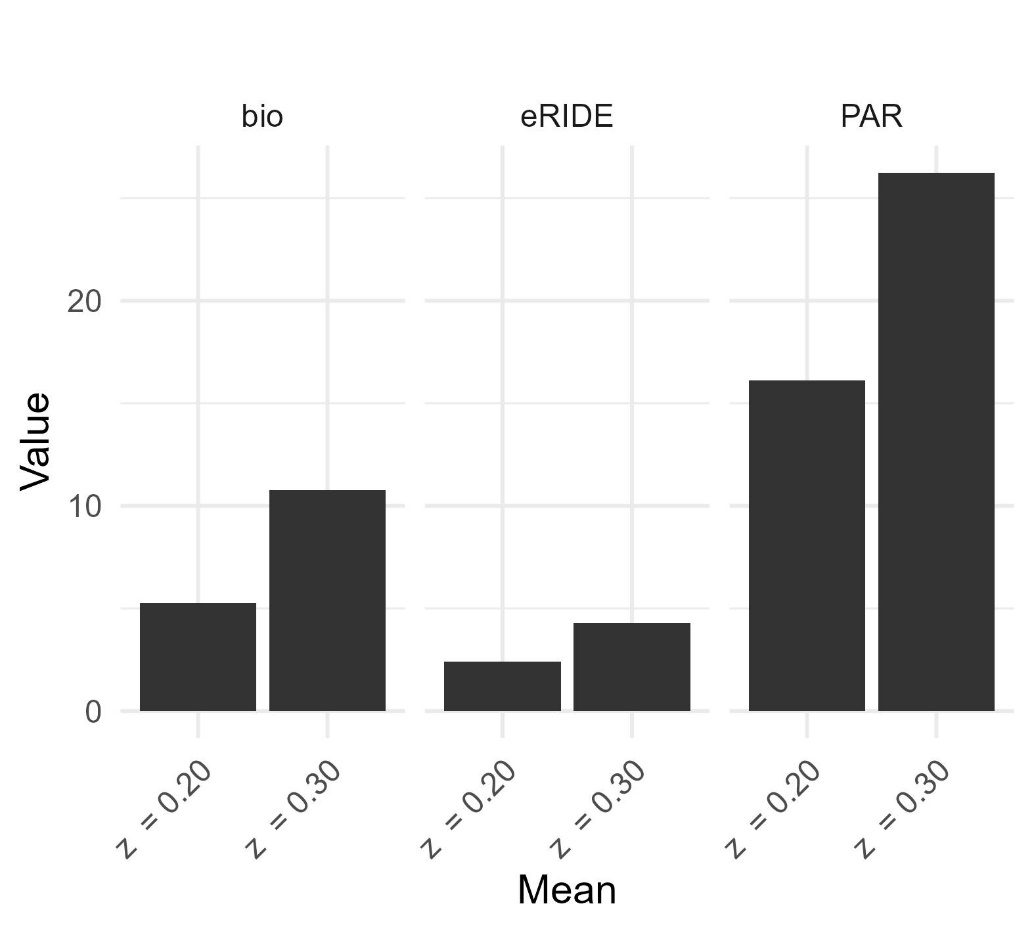


**Figure S1. Comparison of estimates for different z-values for the SAR relationship and its effect on eRIDE and PAR estimates considering the 500 m scale**.


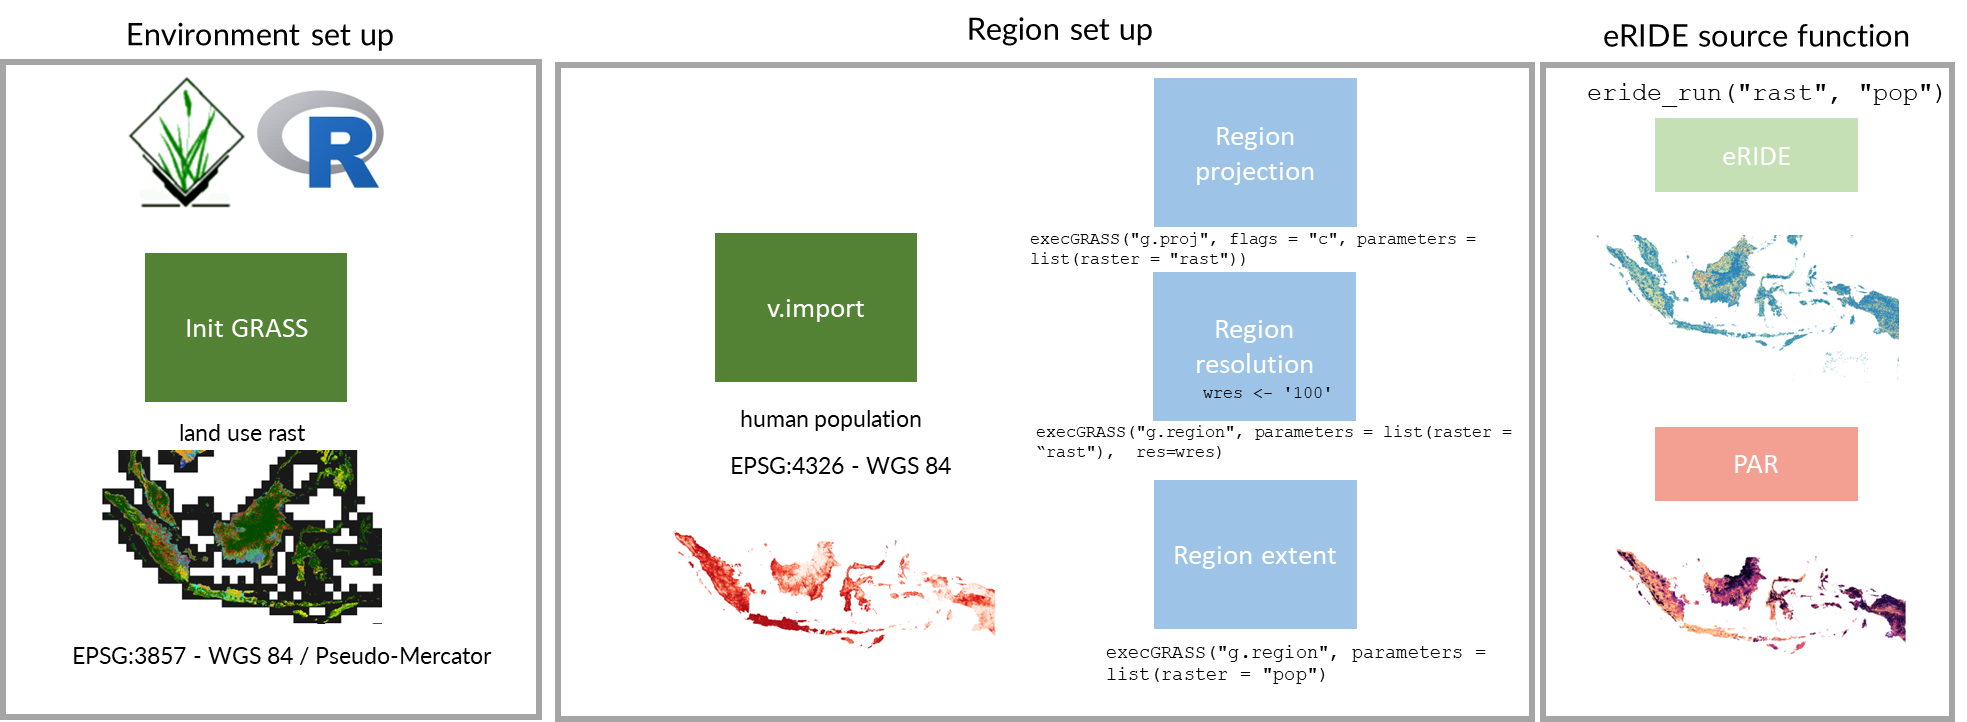


##### **Figure S2. Workflow for calculating estimated risk for novel infectious disease emergence (eRIDE) and population at risk (PAR) at multiple spatial resolutions.** Extents and projection are given in meters, area of forest fragment is given as pixel counts, eRIDE and PAR are relative estimates.


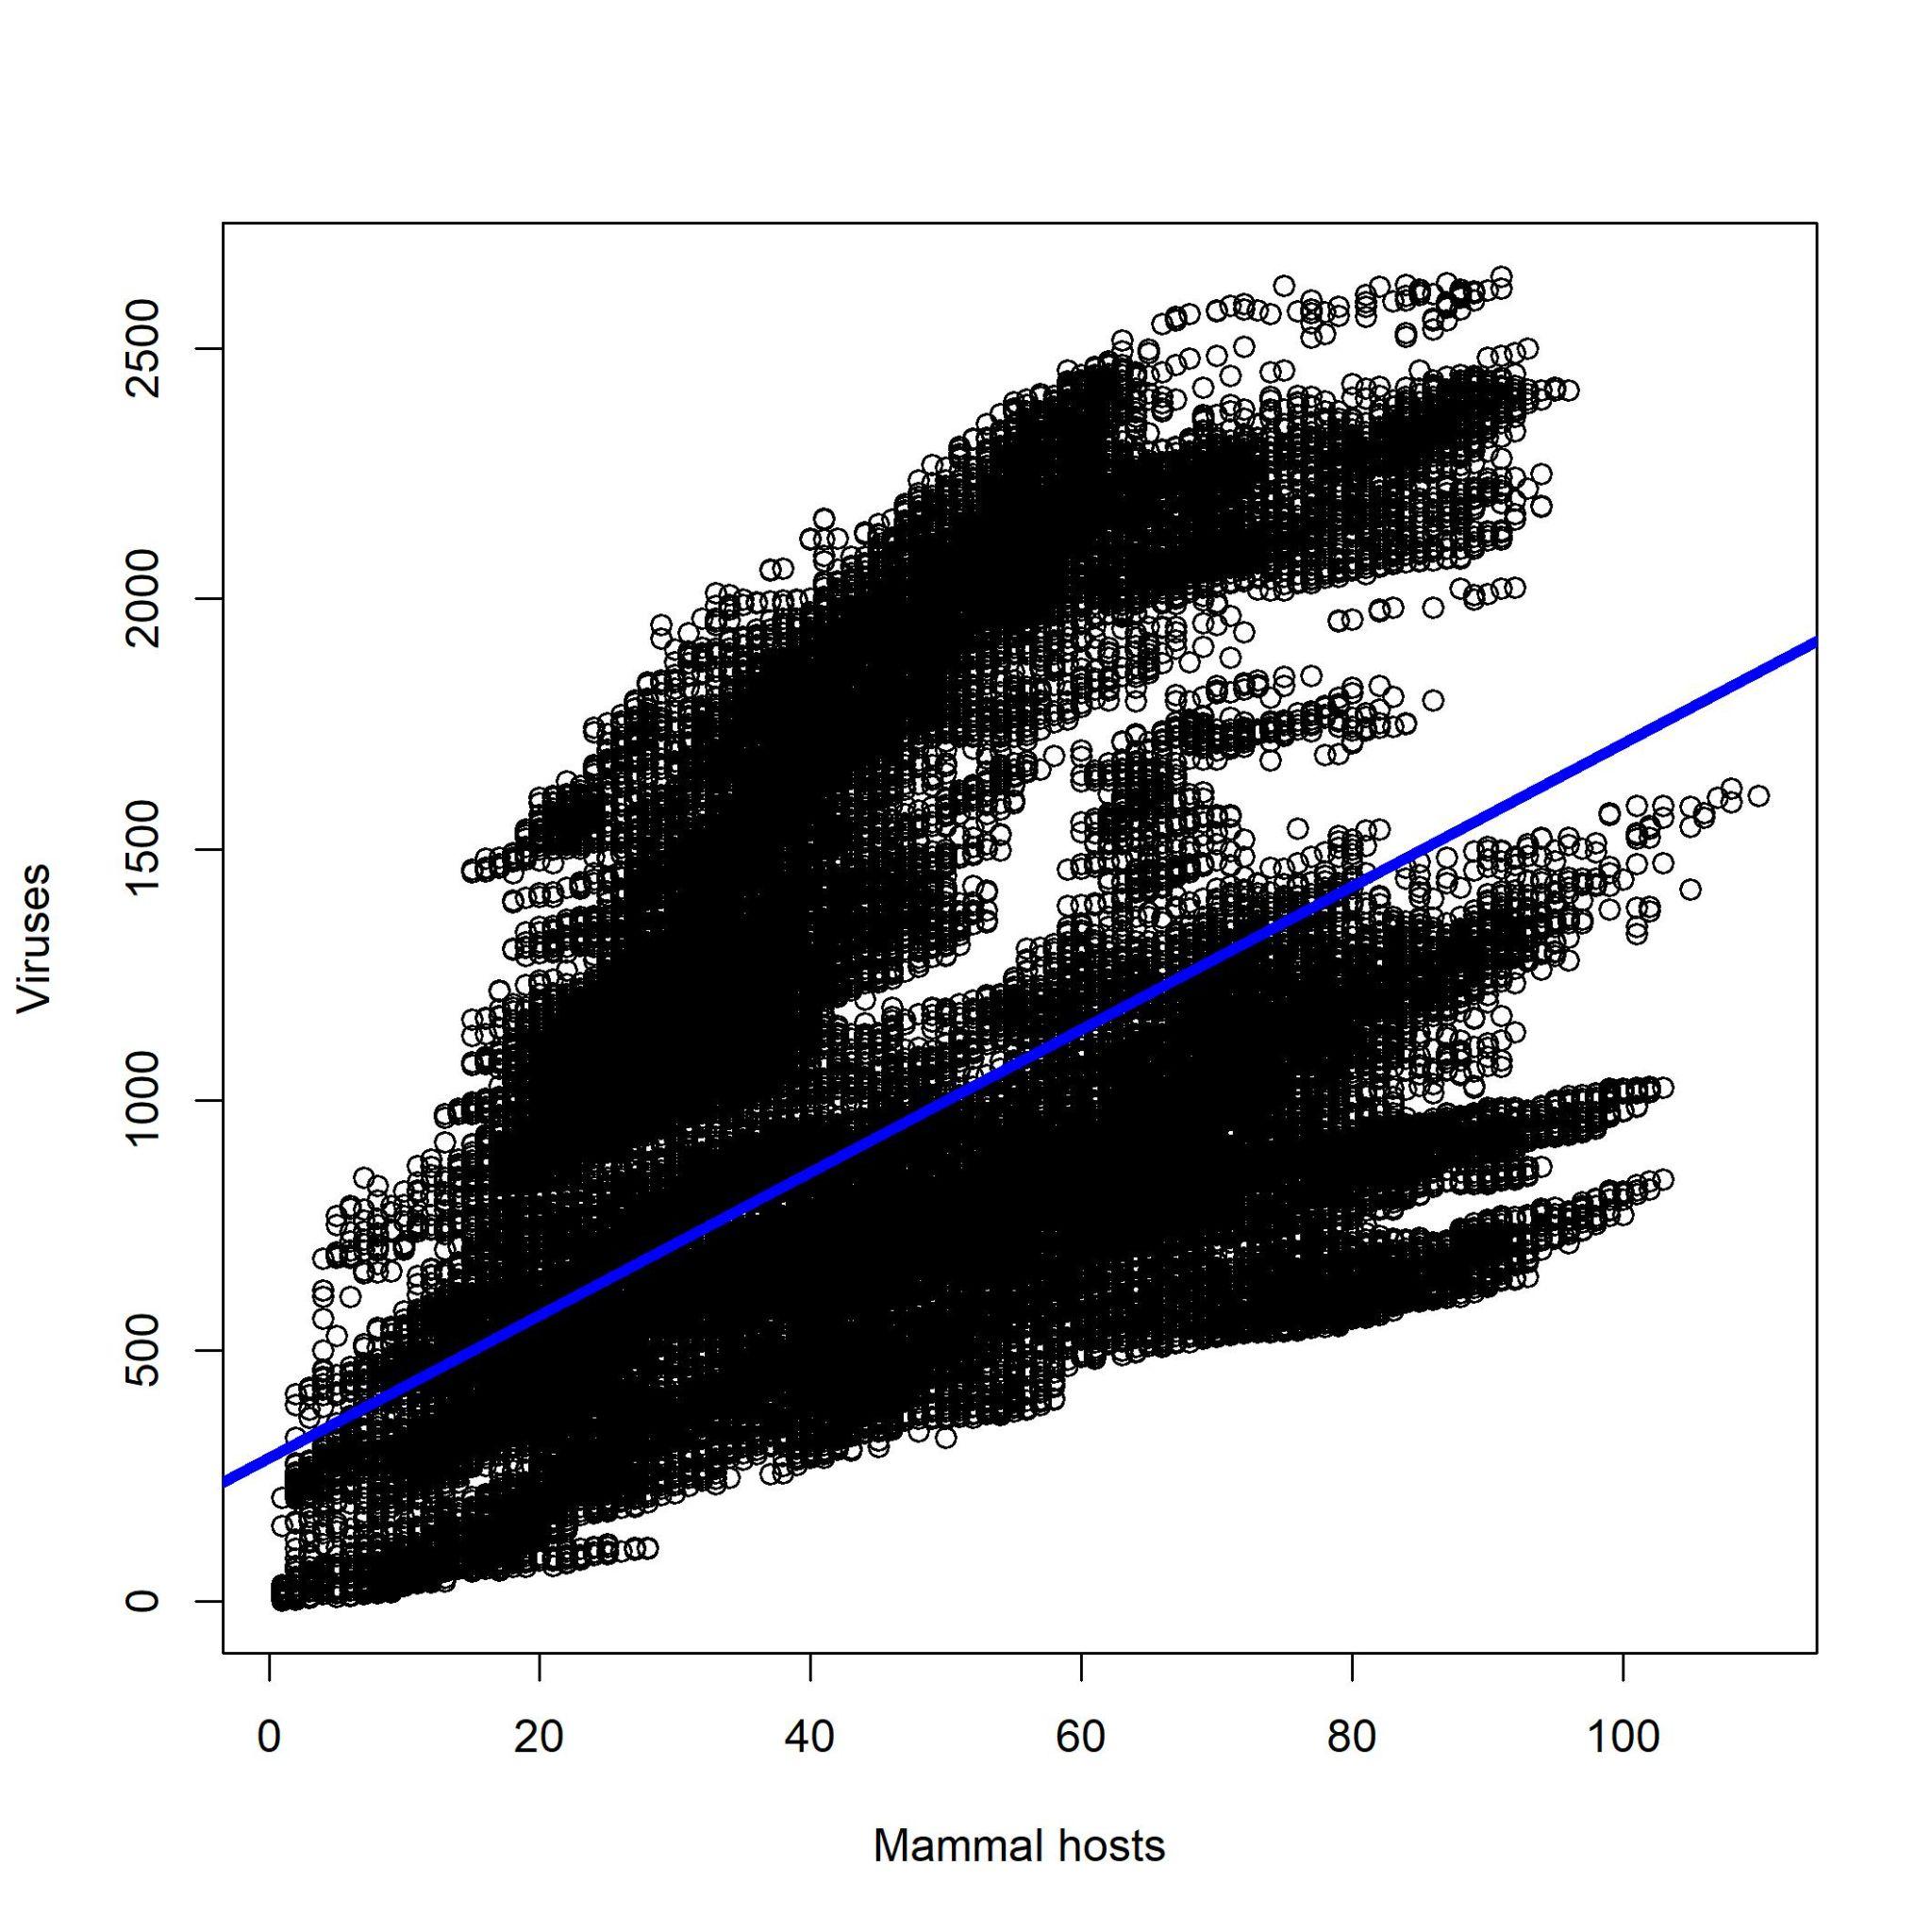


##### **Figure S3. Positive relationship between terrestrial mammals species richness and number of mammal viruses displayed with a simple linear model.** Hosts of viruses were extracted based on infection data and their distribution accessed on 2nd Feb 2023 in Virion v0.2.1 1 and IUCN range data 2 at 0.25 dd resolution (~27 km). For our posterior analysis, we used total estimated species richness to calculate the estimated risk for novel infectious disease emergence (eRIDE), since pathogen diversity scales up with total diversity.


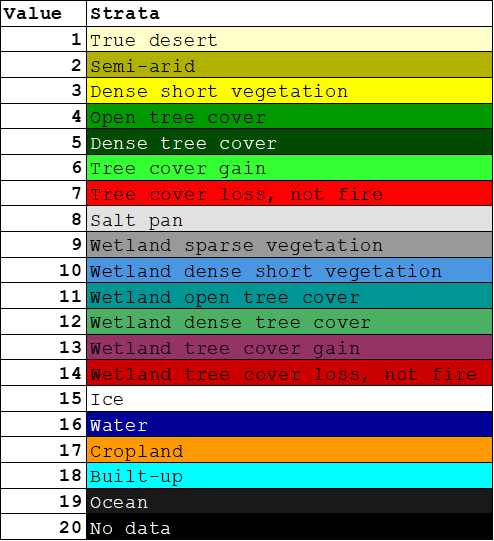


##### **Figure S4. Legend of land cover raster used to calculate estimated risk for novel infectious disease emergence (eRIDE).** Forest codes used: 5, 6, 12, 13, which are dense tree cover, tree cover gain, wetland dense tree cover and wetland tree cover gain. Data source: GLAD GlobeCover for the year 2019 [20](https://paperpile.com/c/jkfey0/crOx) (<https://glad.umd.edu/dataset/global-land-cover-land-use-v1>)


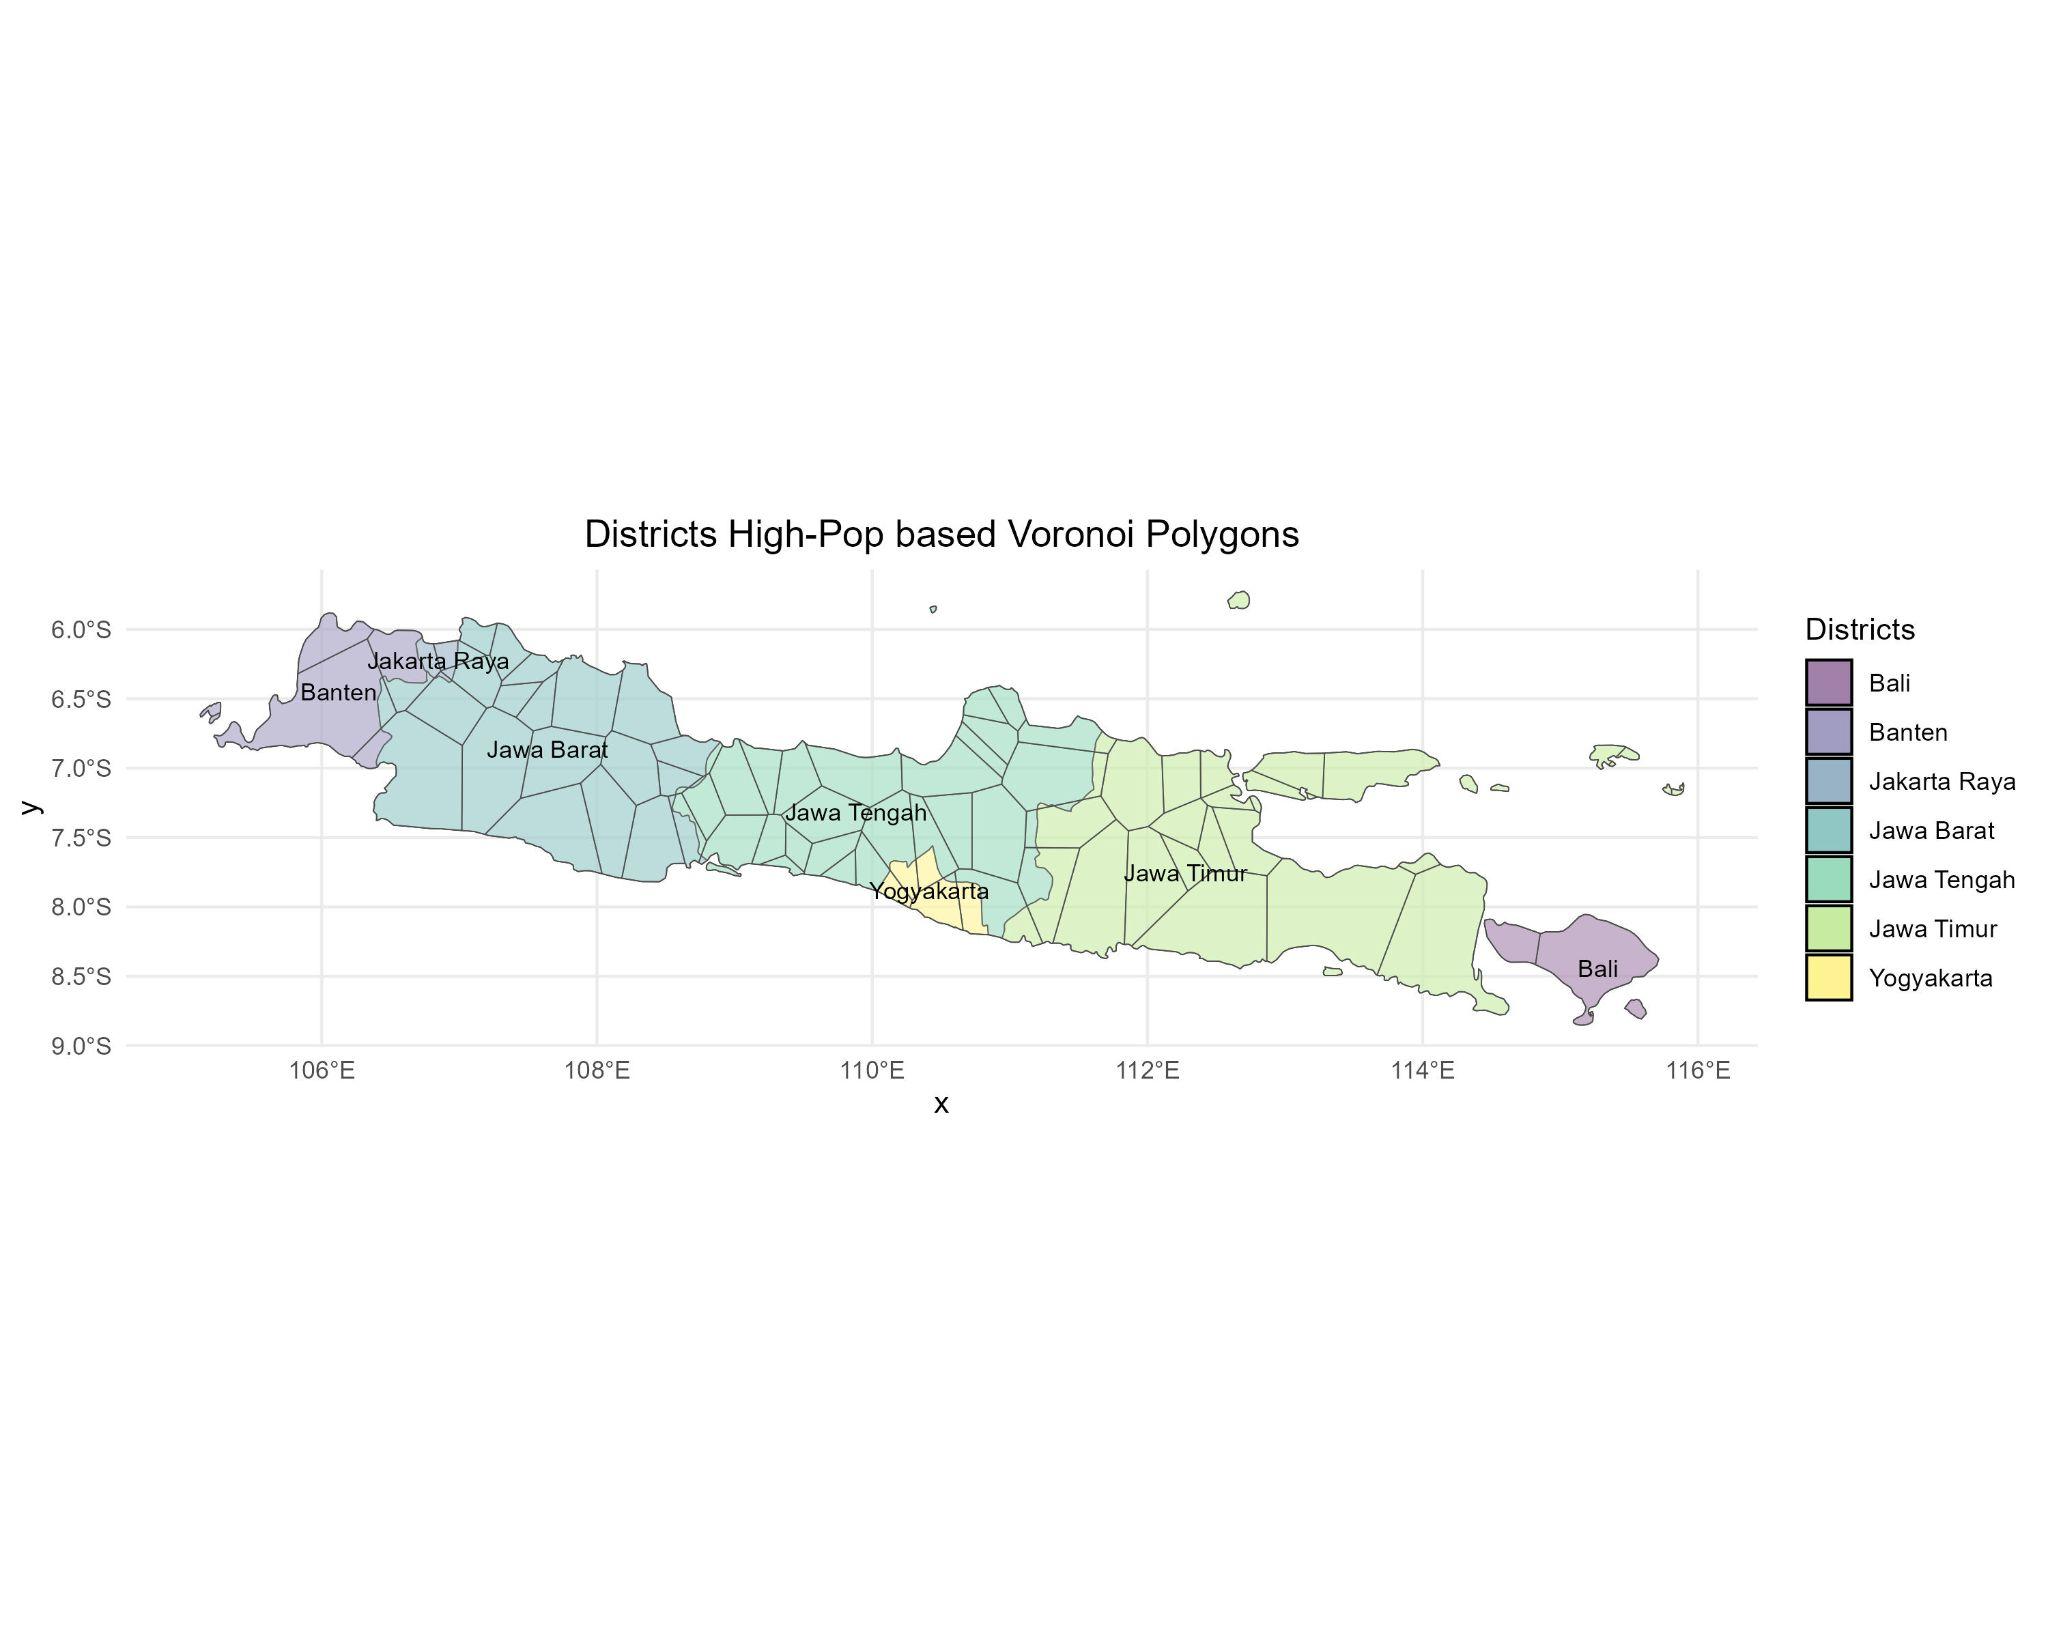


##### **Figure S5. High-population spatial domains through Voronoi Tessellation.** The Voronoi polygons were linked to original province extents based on a majority of area rule. We used three methods for receiving risk estimates**:** administrative province gravity model, high-population spatial domains through Voronoi Tessellation (displayed as map polygons) gravity model and pixel-based analysis.


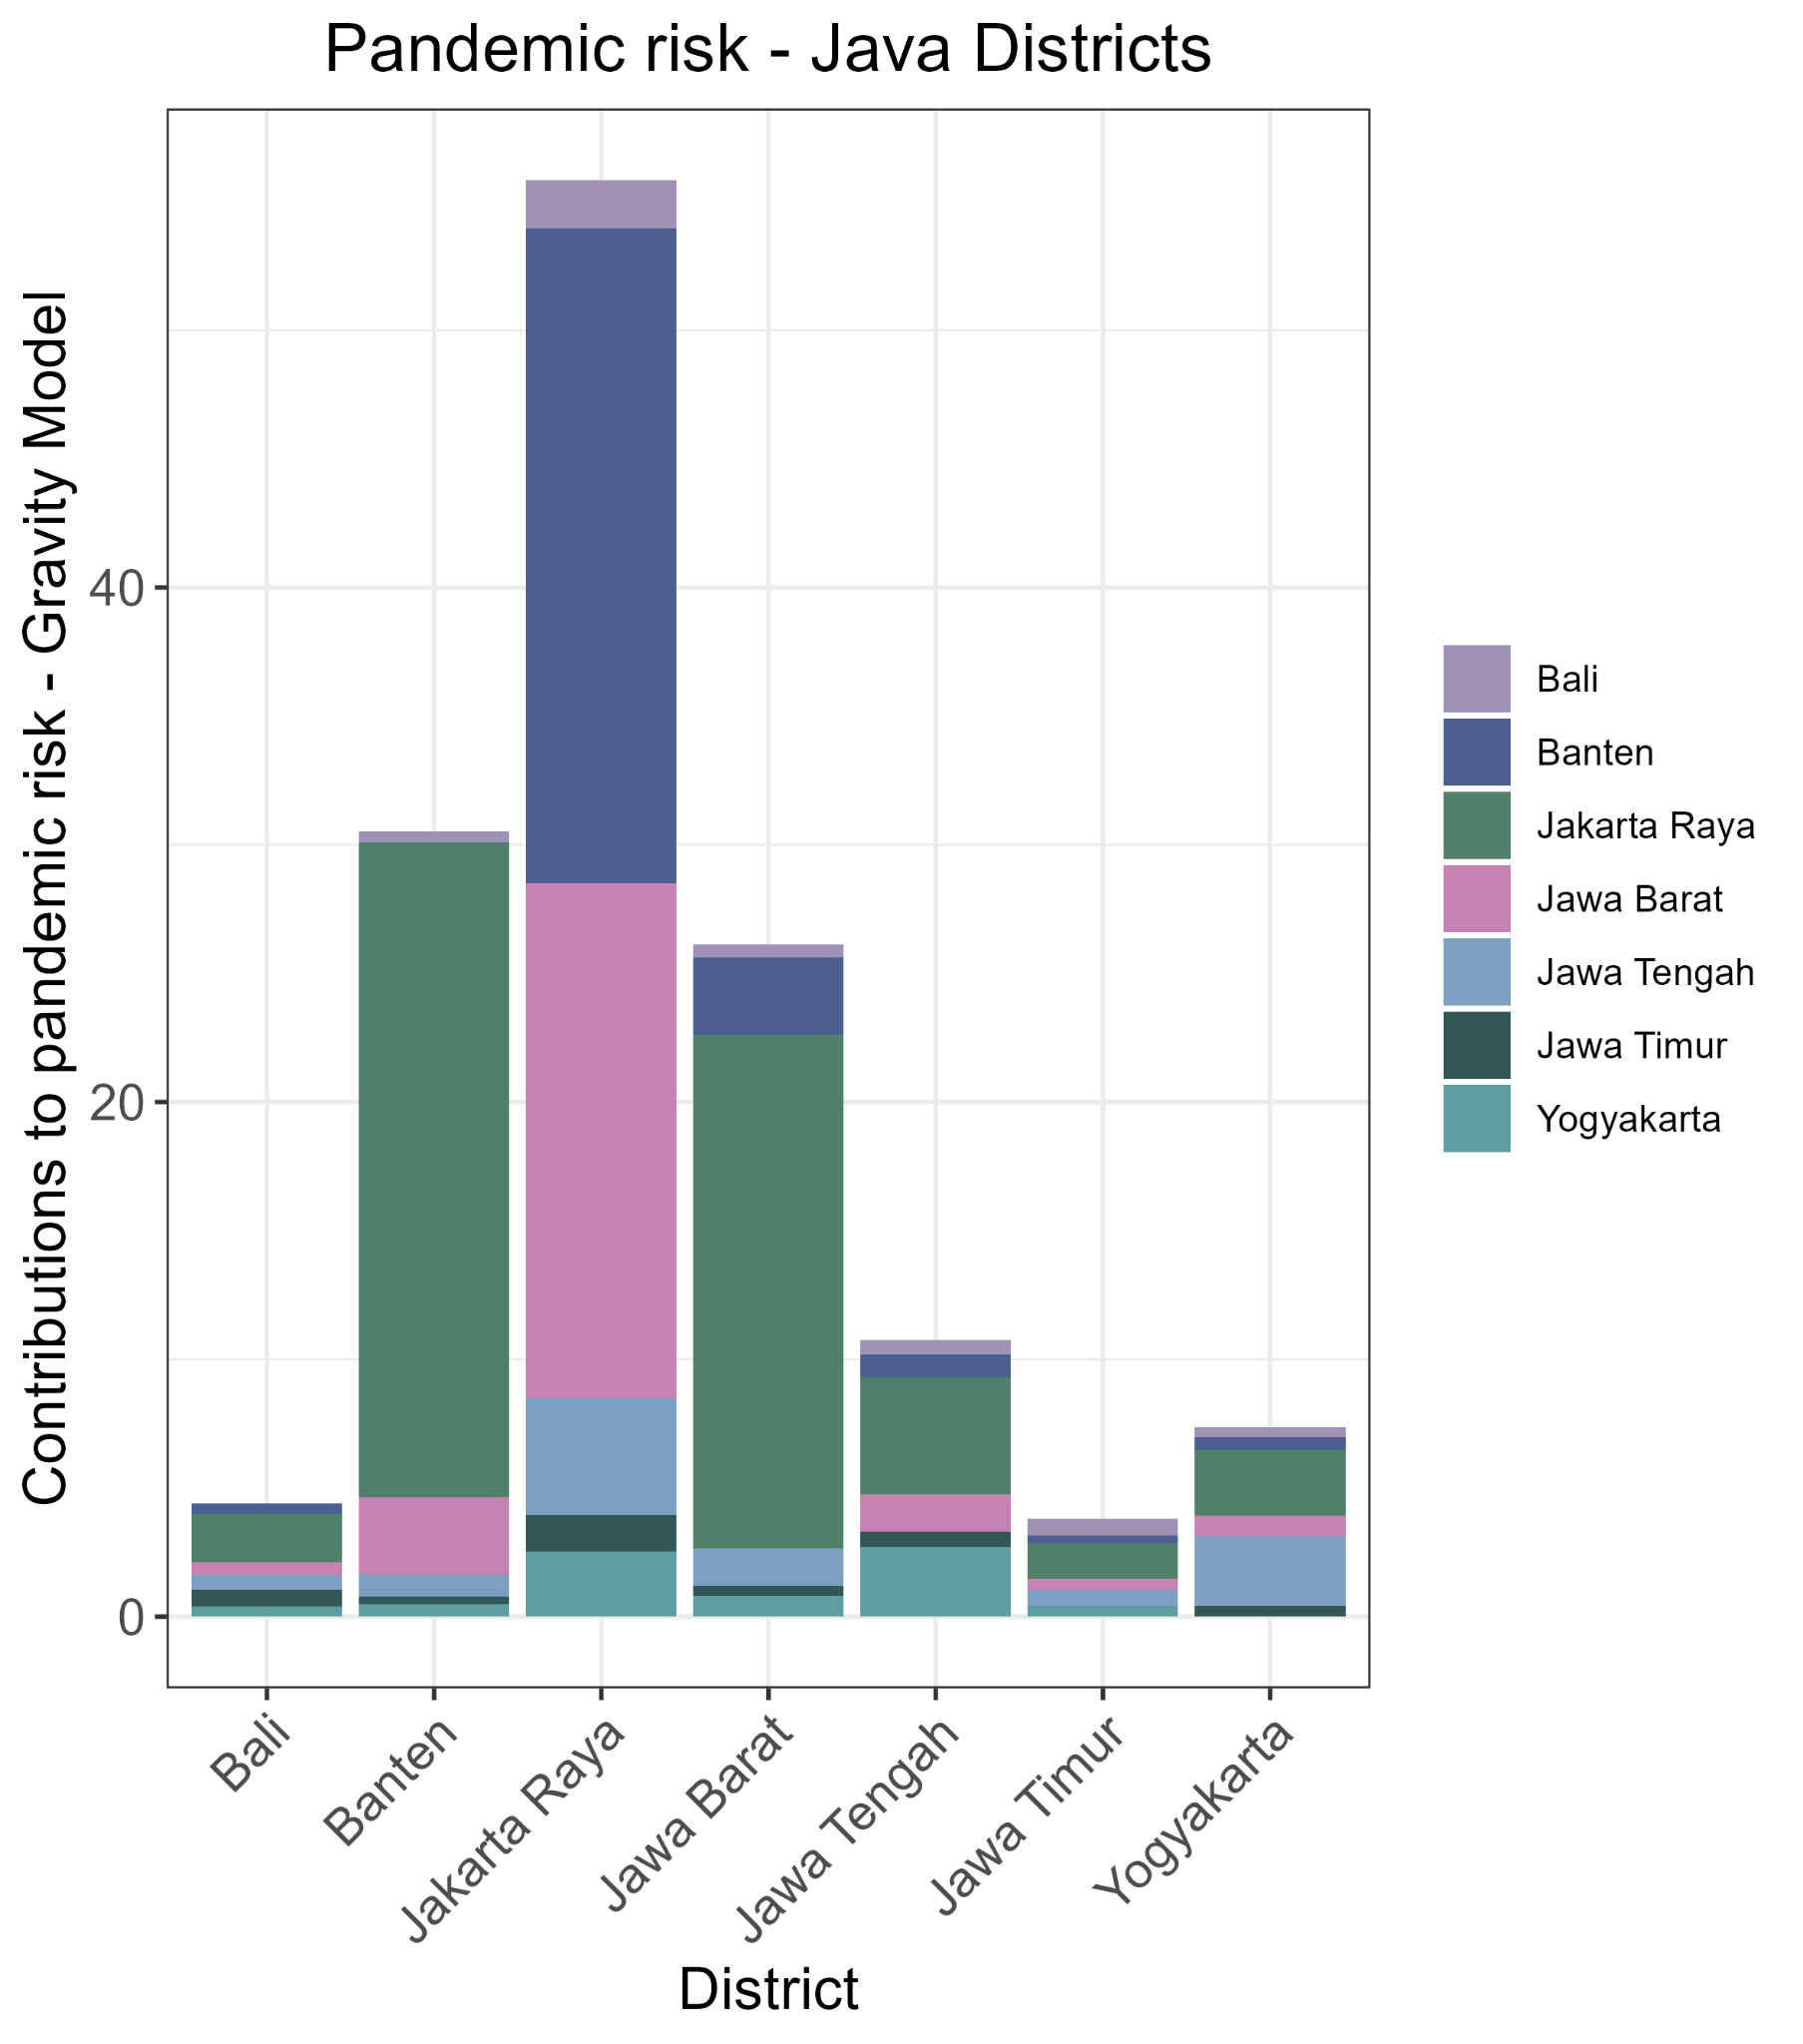


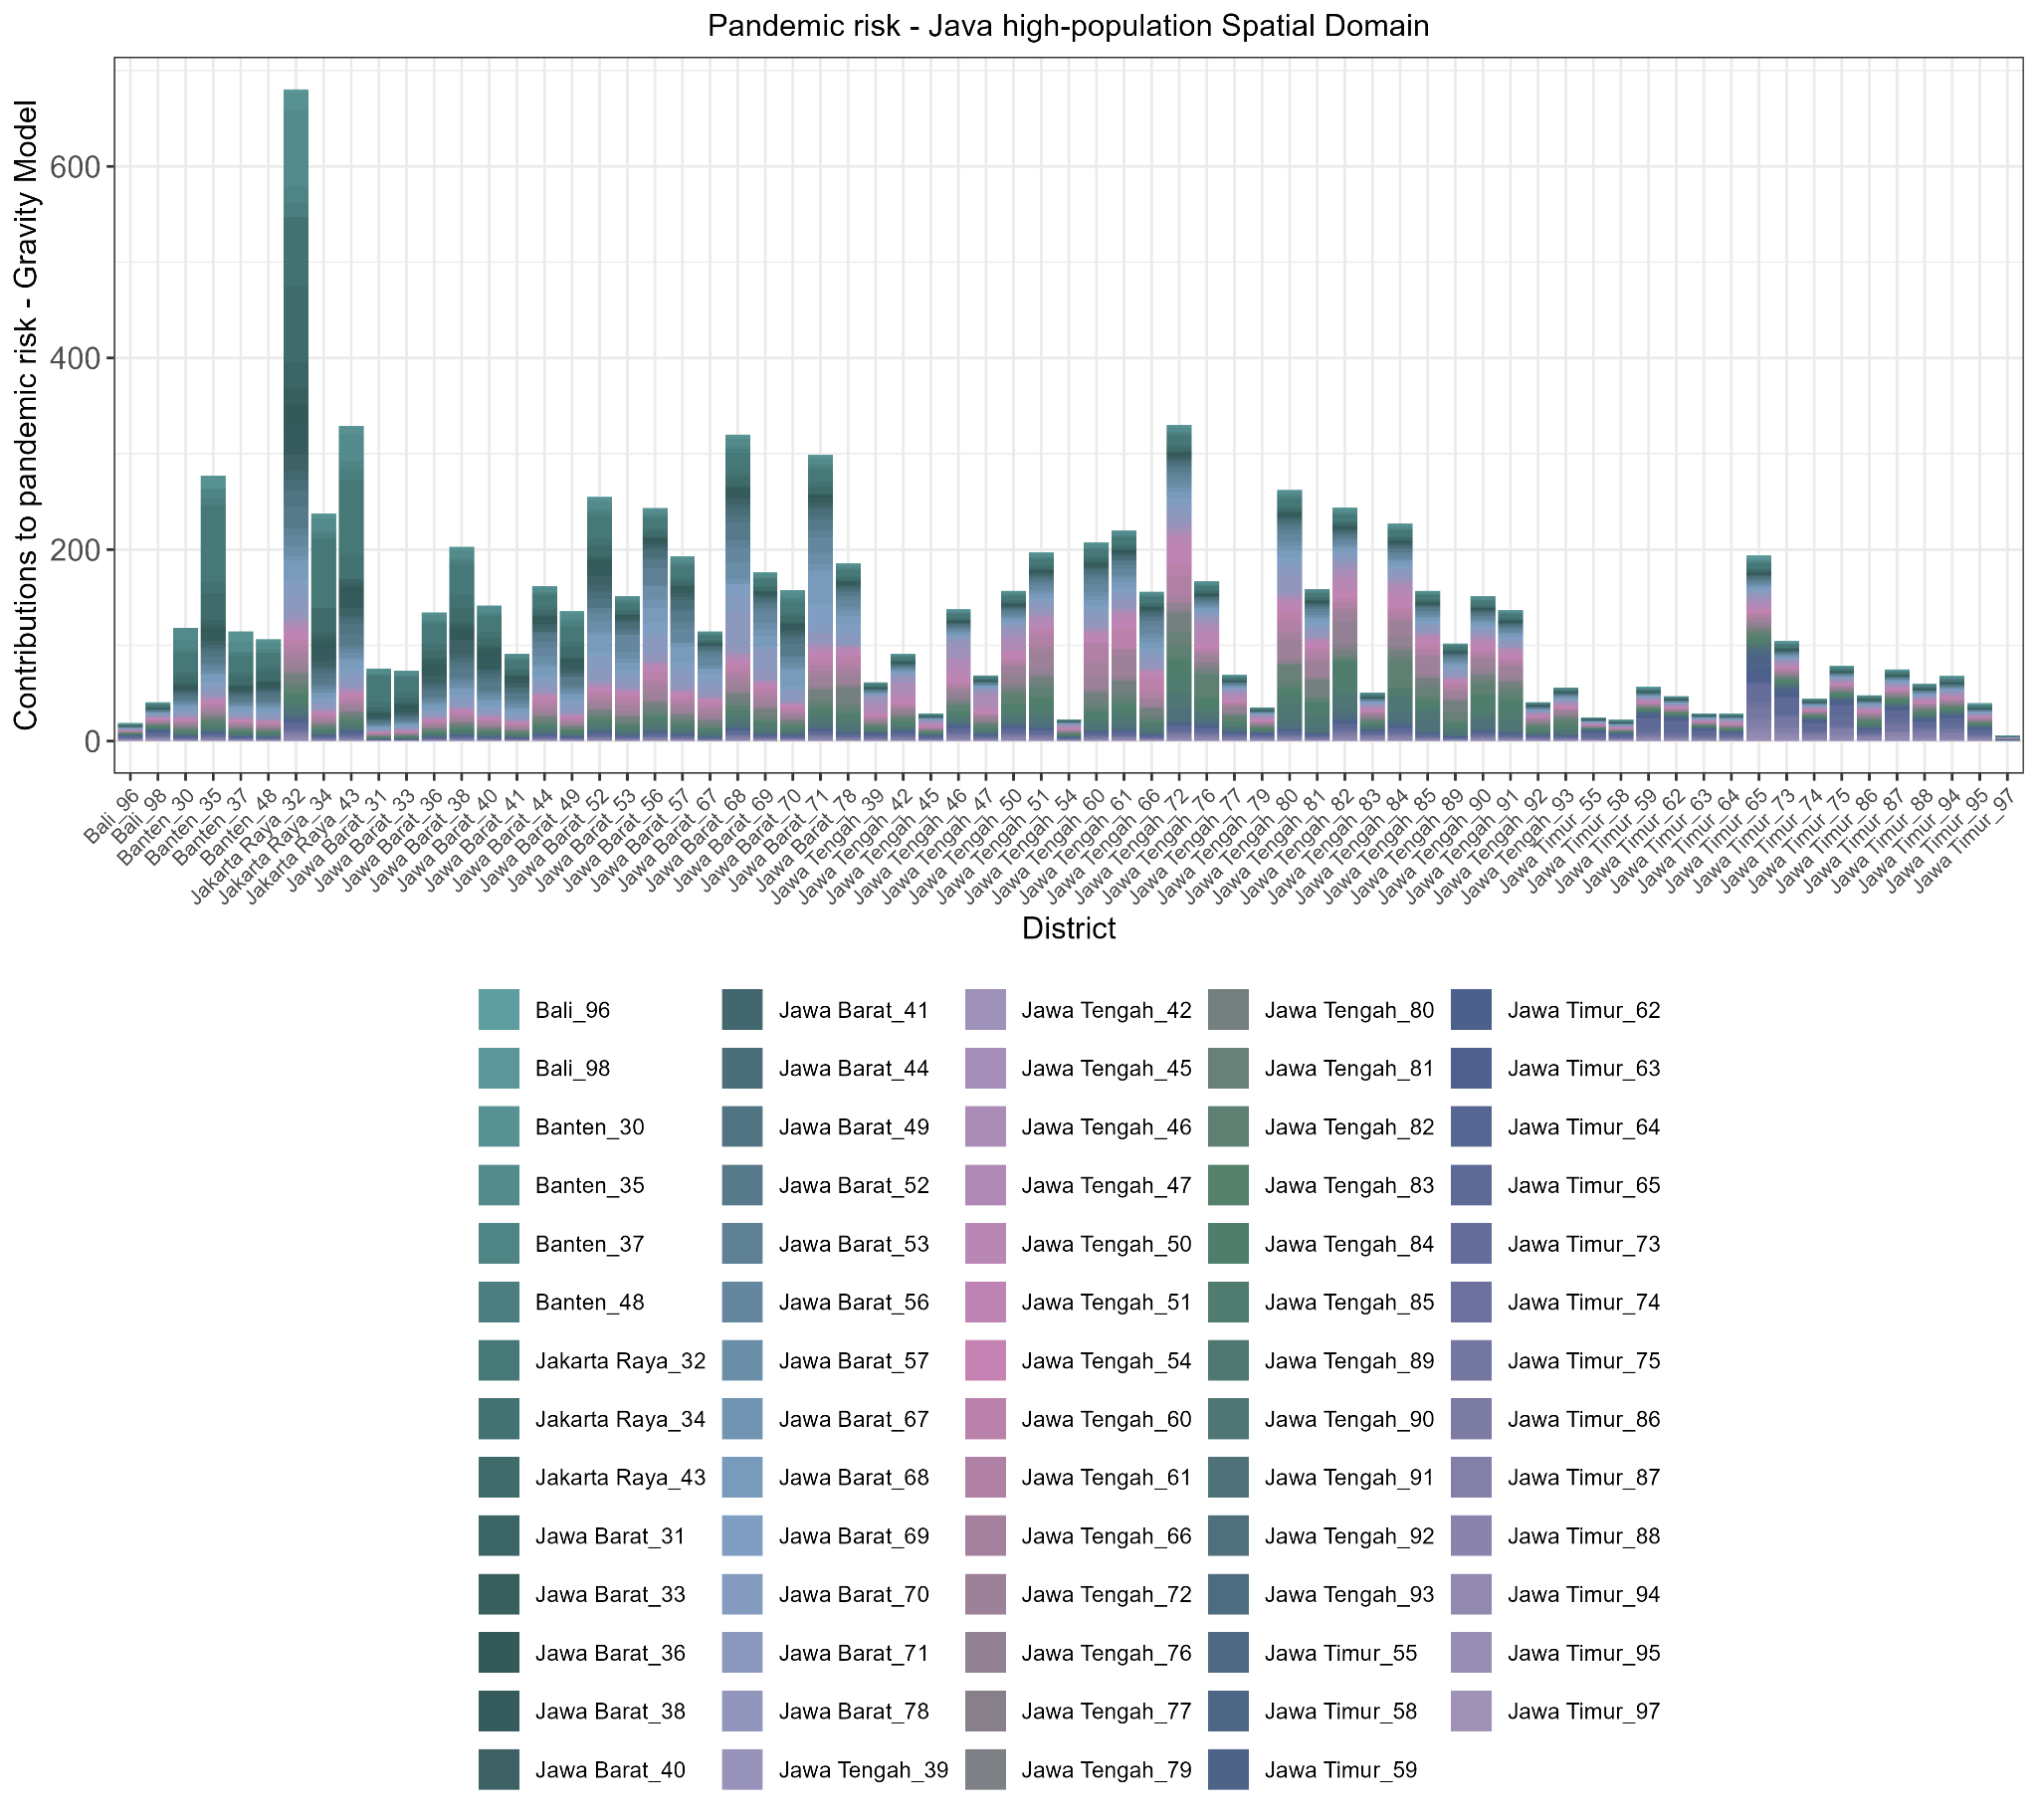


**Figure S6. Epidemic risk values and zones of influence using the gravity model.** The overall received epidemic risk based on estimated risk for novel infectious disease emergence (eRIDE) and PAR was calculated for each (A) region and (B) high-populated Voronoi spatial domains (native resolution of 100 m for the population data used as input).

##### **
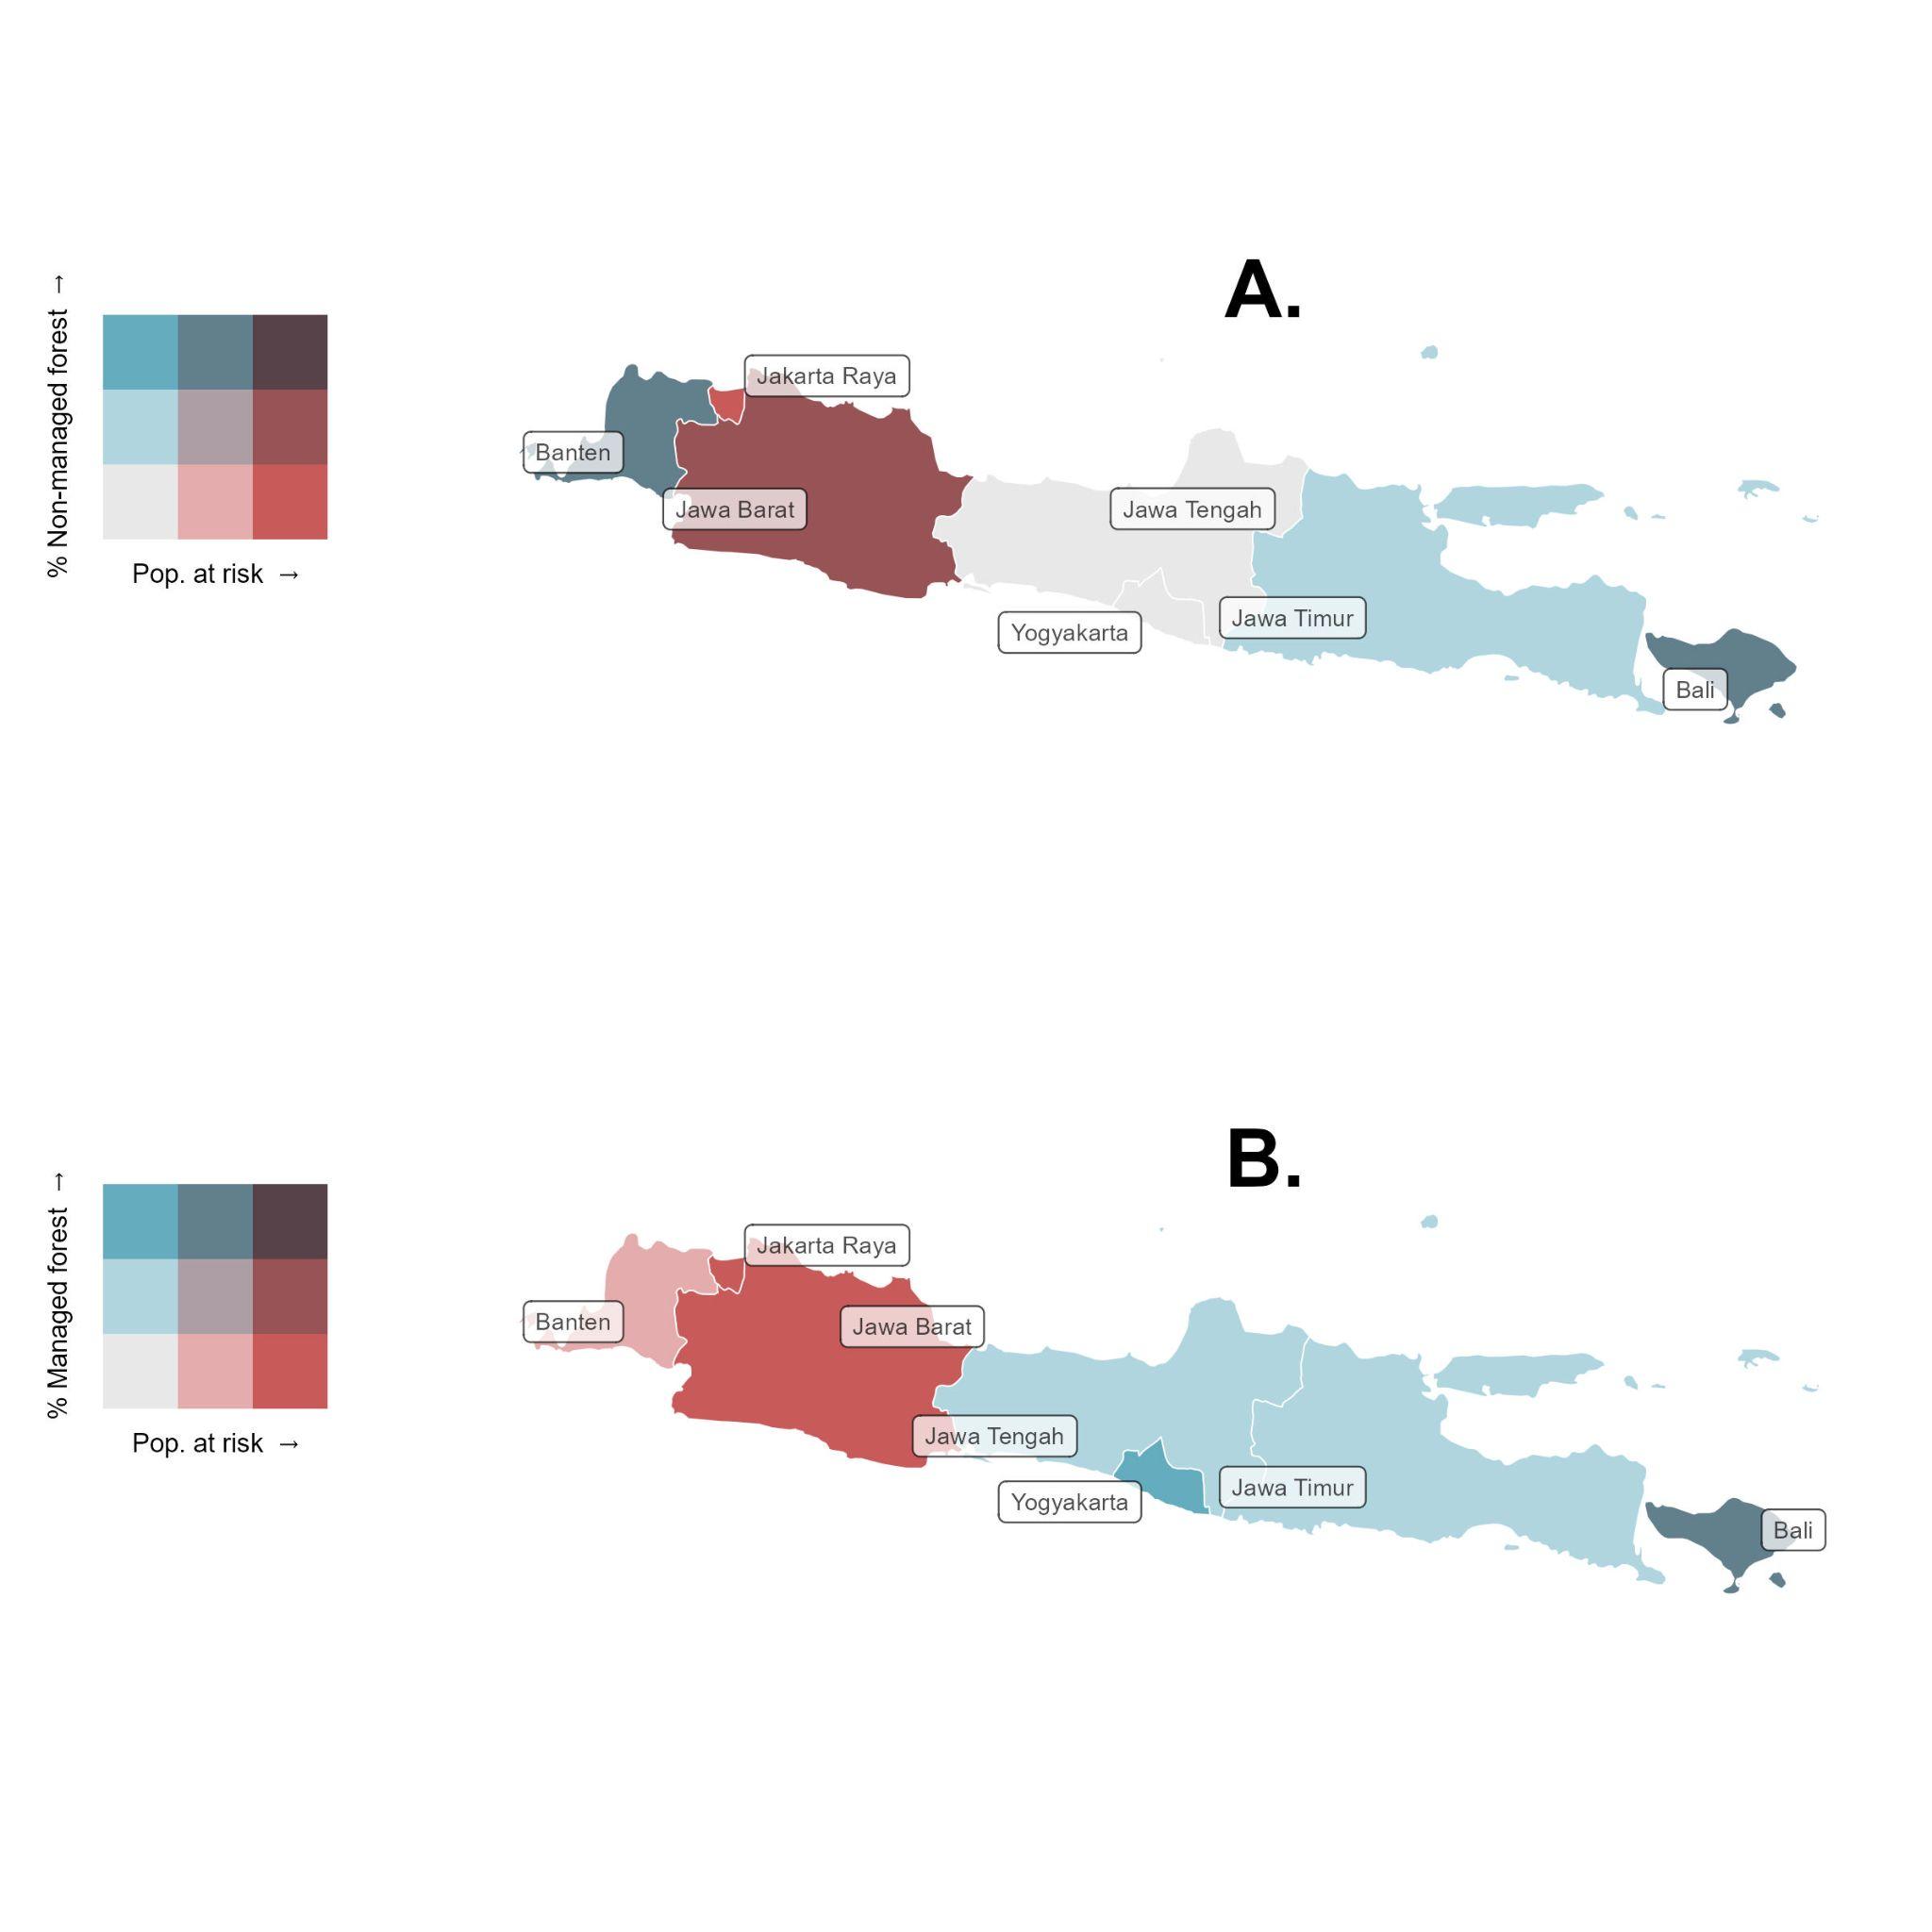
****Figure S7. Area covered by non-managed forest (A) and (B) intensely managed agroforestry and the distribution of population at risk based on gravity models throughout provinces of Java.**


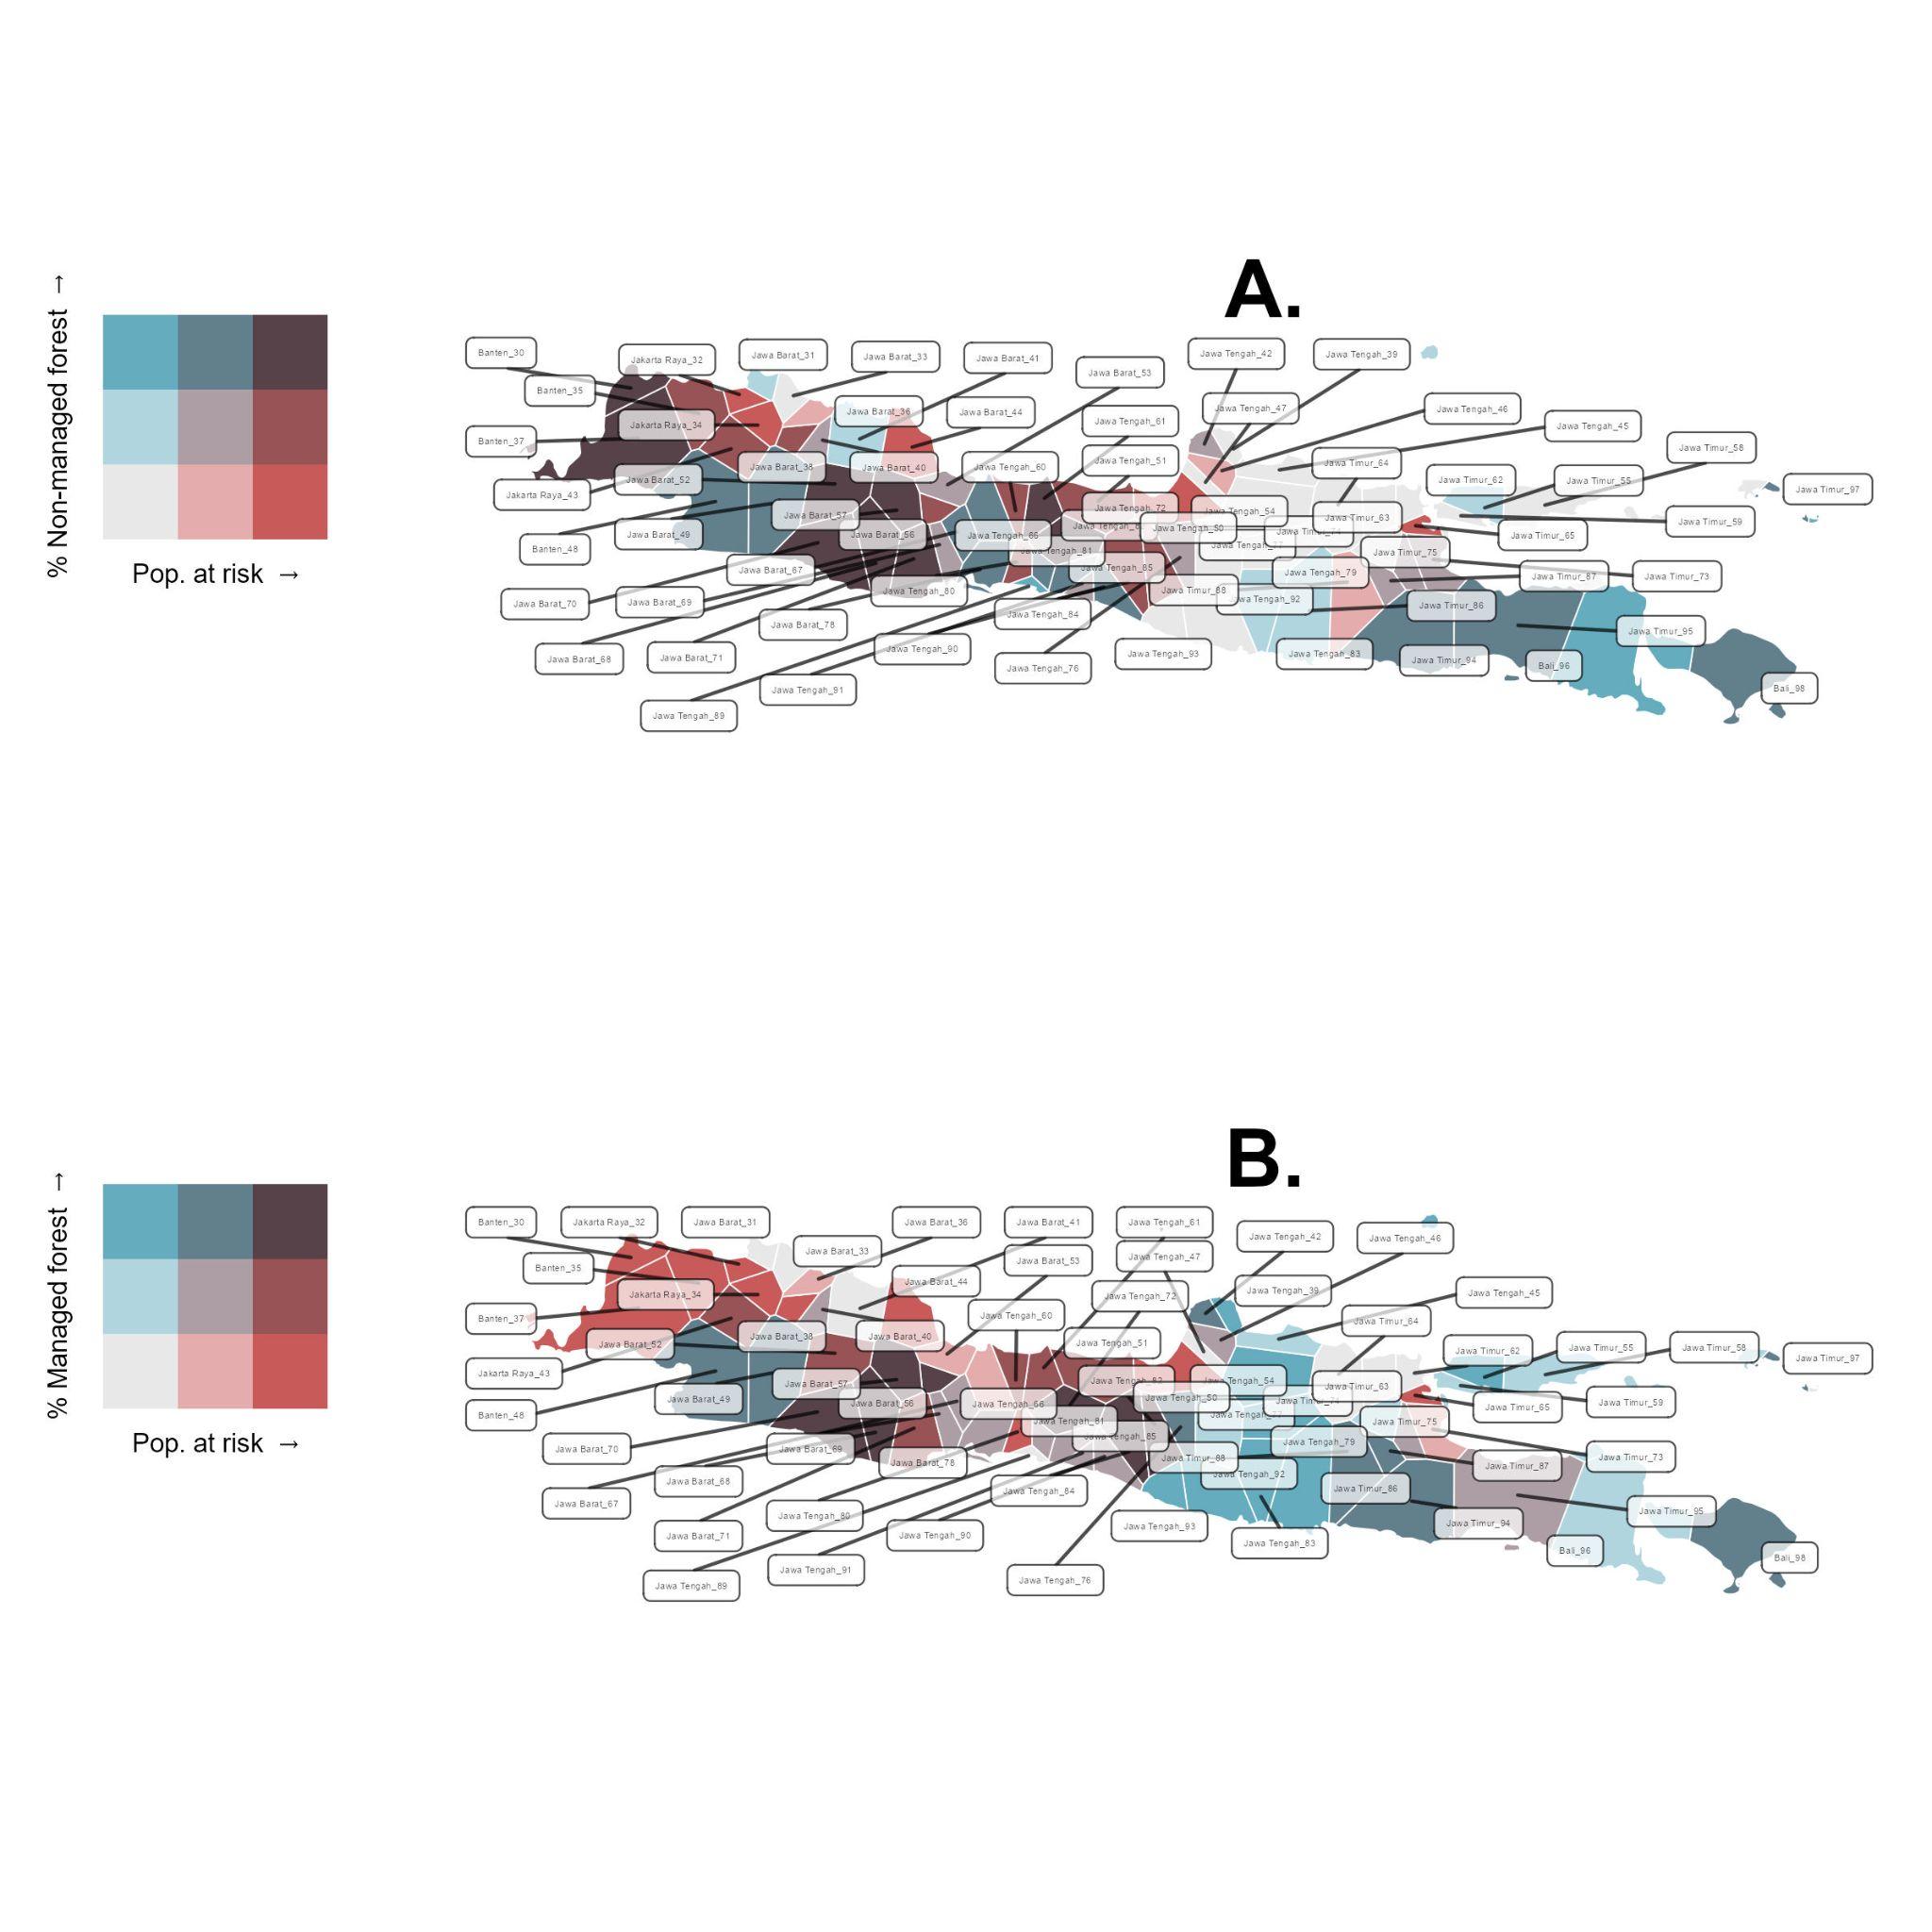


##### **Figure S8. Area covered by non-managed forest (A) and (B) intensely managed agroforestry and the distribution of population at risk.** Data for population at risk was calculated using the Voronoi-tessellation of highly populated centres and gravity models throughout provinces of Java.


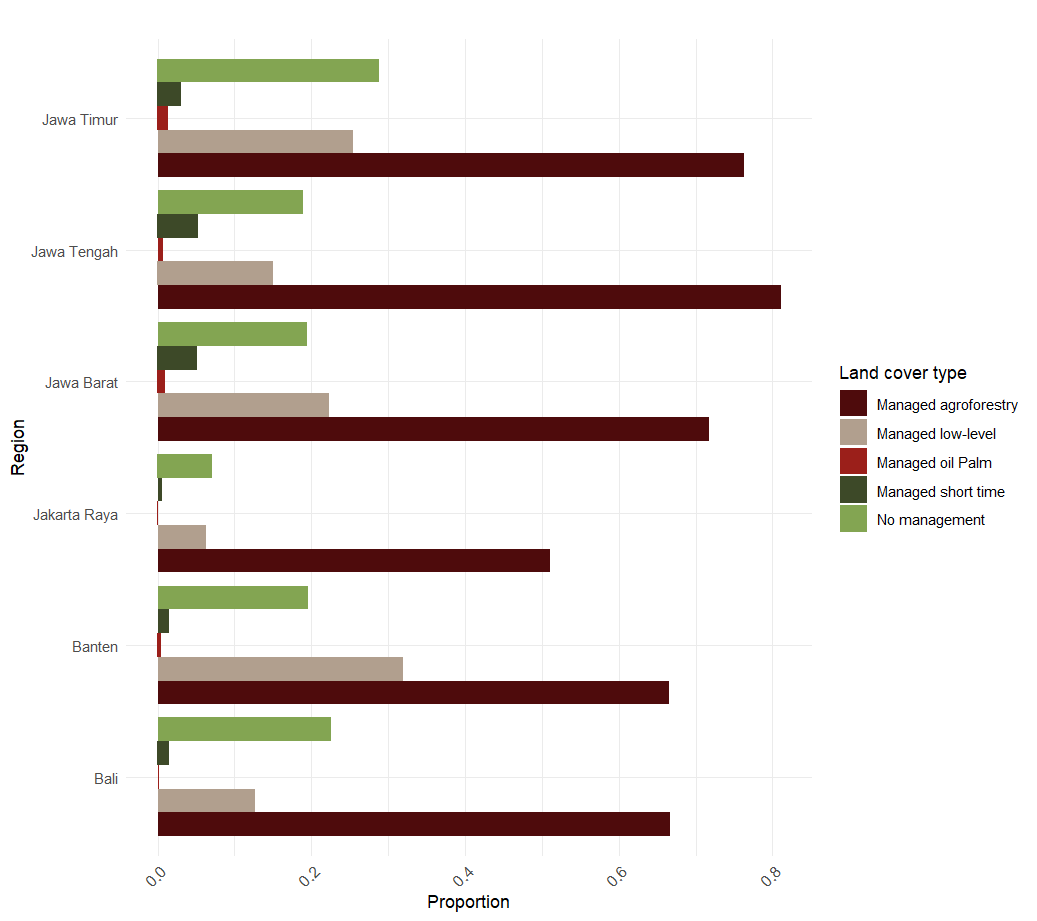


##### **Figure S9. Categories of managed and unmanaged forest cover values and distribution in Java provinces.**


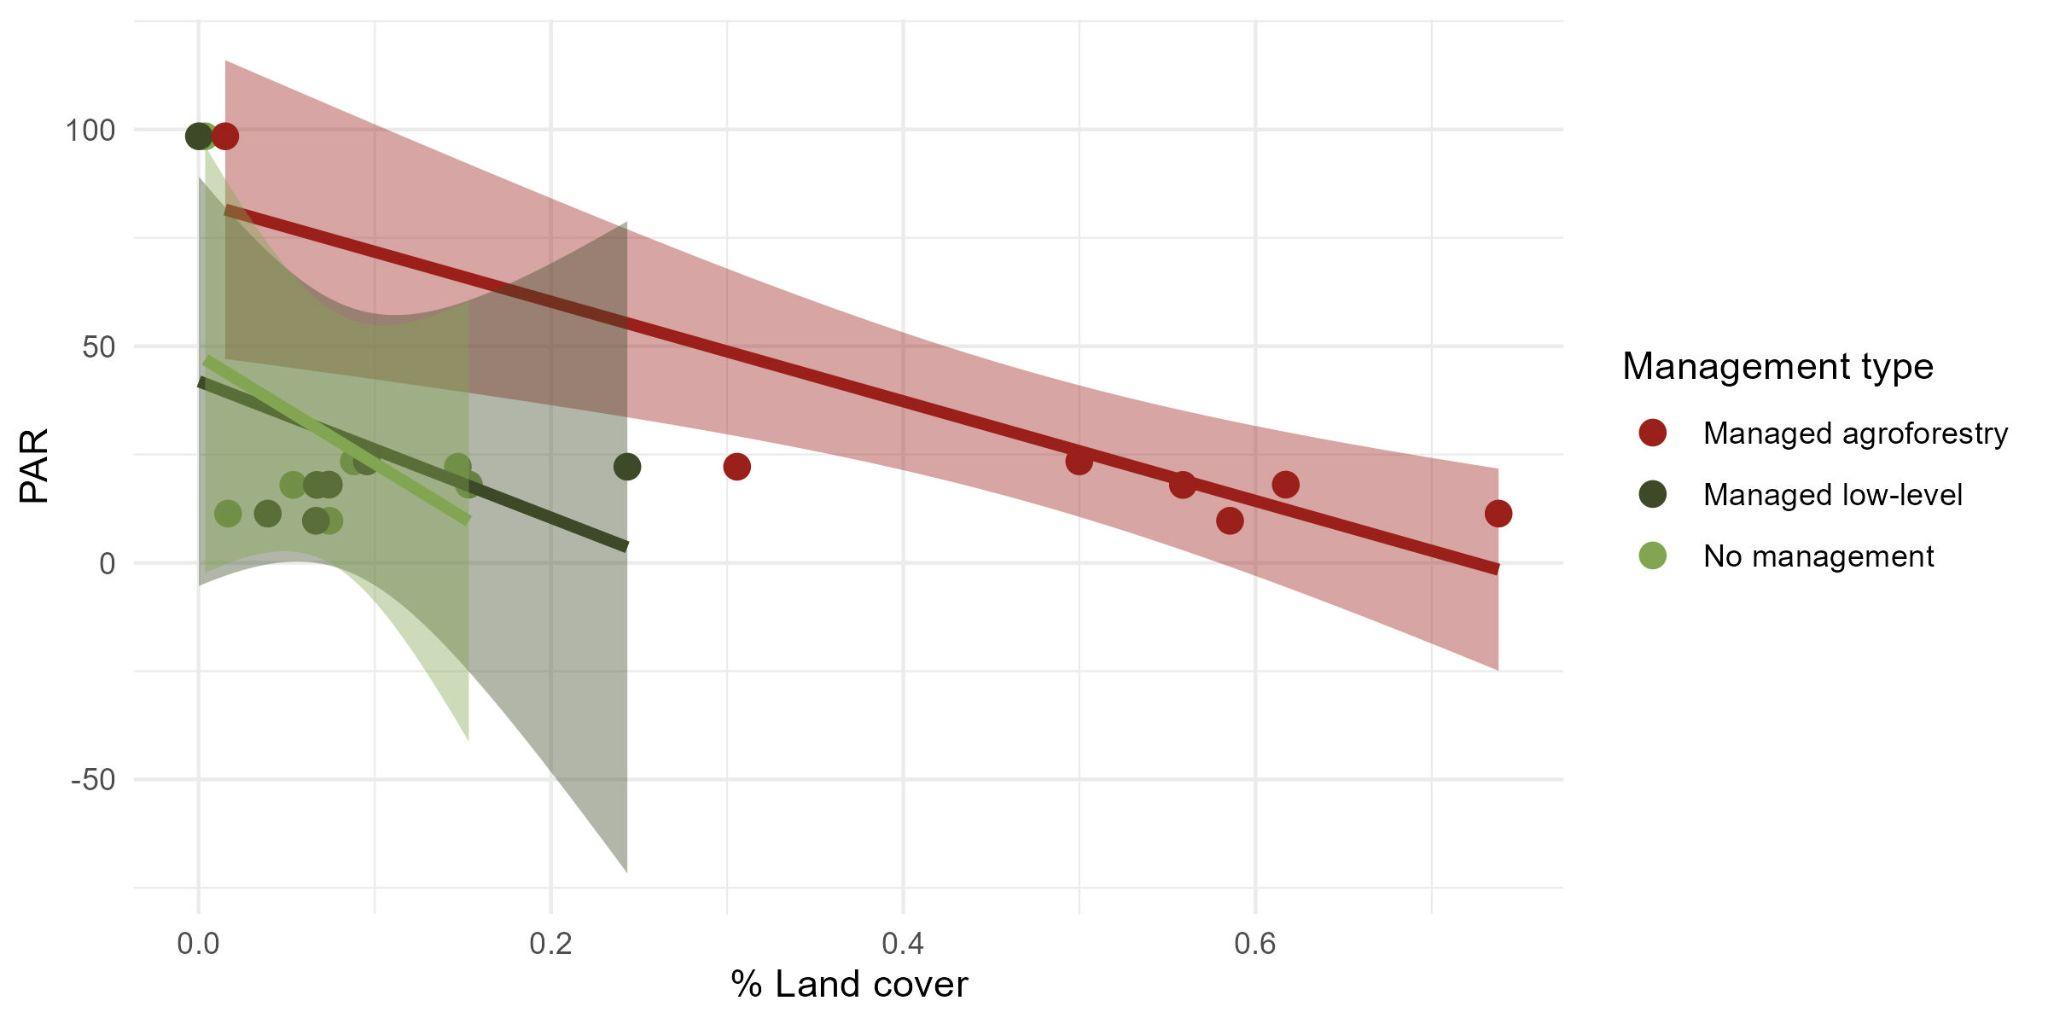


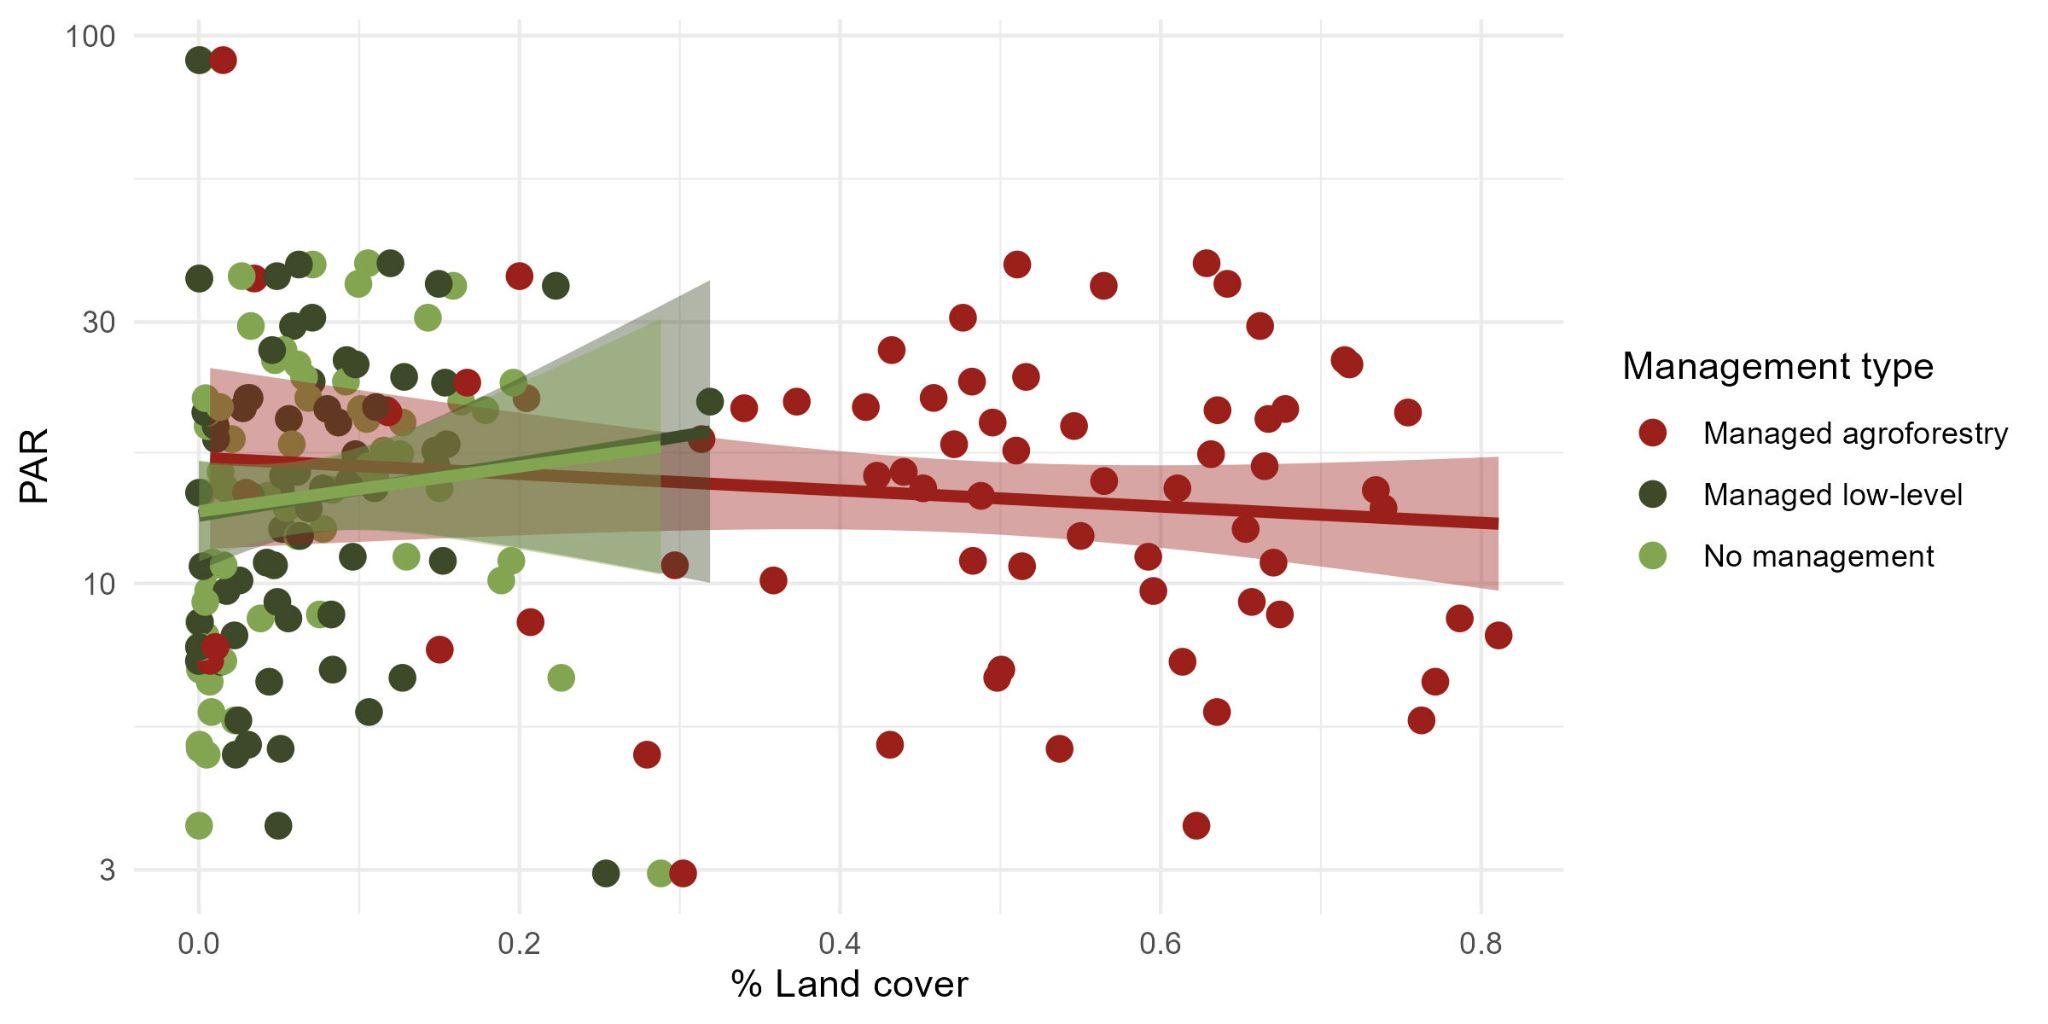


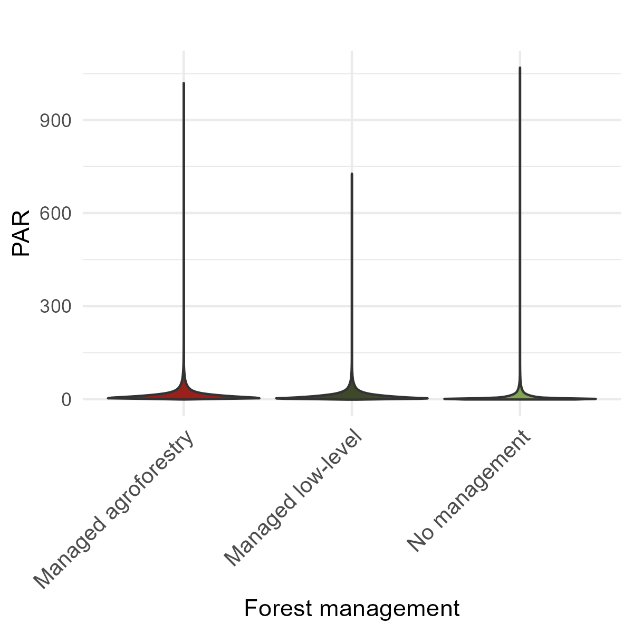


**Figure S10. Relationship between land cover of different forest management types across provinces and population at risk estimates from eRIDE model (100 m).** Top panel: province-level data aggregation. Middle panel: high-pop driven gravity model spatial domains. Top and middle panel display a linear function on the top of the data with 95% confidence intervals. and Bottom panel: violin plot of pixel-level data across Java.

**References**

1. Carlson, C. J. et al. The Global Virome in One Network (VIRION): an Atlas of Vertebrate-Virus Associations. MBio e0298521 (2022).
2. IUCN. The IUCN Red List of Threatened Species. Version 2020-2. The IUCN Red List of Threatened Species. Version 2020-2. https://www.iucnredlist.org. Downloaded on 09 May (2020).
